## RESEARCH REPORT

# Faithful mRNA splicing depends on the Prp19 complex subunit *faint sausage* and is required for tracheal branching morphogenesis in *Drosophila*

Julia Sauerwald<sup>1,2,3</sup>, Charlotte Sonesson<sup>3,4</sup>, Mark D. Robinson<sup>3,4</sup> and Stefan Luschni<sup>1,2,3,\*</sup>

## ABSTRACT

Morphogenesis requires the dynamic regulation of gene expression, including transcription, mRNA maturation and translation. Dysfunction of the general mRNA splicing machinery can cause surprisingly specific cellular phenotypes, but the basis for these effects is not clear. Here, we show that the *Drosophila faint sausage* (*fas*) locus, which is implicated in epithelial morphogenesis and has previously been reported to encode a secreted immunoglobulin domain protein, in fact encodes a subunit of the spliceosome-activating Prp19 complex, which is essential for efficient pre-mRNA splicing. Loss of zygotic *fas* function globally impairs the efficiency of splicing, and is associated with widespread retention of introns in mRNAs and dramatic changes in gene expression. Surprisingly, despite these general effects, zygotic *fas* mutants show specific defects in tracheal cell migration during mid-embryogenesis when maternally supplied splicing factors have declined. We propose that tracheal branching, which relies on dynamic changes in gene expression, is particularly sensitive for efficient spliceosome function. Our results reveal an entry point to study requirements of the splicing machinery during organogenesis and provide a better understanding of disease phenotypes associated with mutations in general splicing factors.

**KEY WORDS:** *Drosophila melanogaster*, Tracheal system, Branching morphogenesis, mRNA splicing, Spliceosome, *Faint sausage*, *Fandango*

## INTRODUCTION

mRNA splicing is required to process nearly all eukaryotic transcripts. As splicing can be rate-limiting for efficient gene expression (Guilgur et al., 2014; Hoyle and Ish-Horowitz, 2013), reduced splicing efficiency can perturb many cellular processes. Although defects in RNA processing have been associated with pleiotropic phenotypes during development (Golling et al., 2002), inactivation of splicing factors can cause surprisingly specific cellular defects (Chen et al., 1998; van der Lelij et al., 2014). Mutations in core components of the spliceosome are associated with human diseases, including retinitis pigmentosa and spinal muscular atrophy (Faustino and Cooper, 2003), and can contribute

to carcinogenesis (Quesada et al., 2011). However, the basis for these specific phenotypes is not clear.

Morphogenesis requires dynamically regulated gene expression programs to coordinate cell movements and differentiation. Tracheal branching morphogenesis in *Drosophila* is guided by the dynamic expression of the fibroblast growth factor (FGF) branchless (Bnl; Sutherland et al., 1996) in cells surrounding the tracheal primordia. Bnl activates the FGF receptor (FGFR) breathless (Btl) on tracheal cells, which move as a cohort towards the Bnl source. Here, we show that mutations in the *faint sausage* (*fas*) gene (Nüsslein-Volhard et al., 1984) specifically affect branch outgrowth and cellular rearrangements during tracheal morphogenesis. We found that *fas* encodes a subunit of the spliceosome-activating Prp19 complex (Prp19C; also known as NineTeen complex, NTC; Chanarat and Sträßer, 2013), contrary to an earlier report that *fas* encodes a secreted immunoglobulin (Ig) domain protein (Lekven et al., 1998). Lack of zygotic *fas/Prp19C* function broadly impairs the efficiency of mRNA splicing and leads to extensive changes in global gene expression. Our findings suggest that tracheal branching morphogenesis is particularly sensitive to efficient spliceosome function, thus providing an entry point to investigate the requirements of splicing during organogenesis.

## RESULTS

### A new gene required for tracheal branching morphogenesis

We isolated two allelic embryonic lethal mutants (*P218* and *H124*) that were defective in primary tracheal branching (Fig. 1). While wild-type embryos have formed an interconnected tracheal network by 12 h after egg laying (AEL), tracheal branch outgrowth was impaired in *P218* and *H124* homozygous (Fig. 1A,B; Movie 1) and in *P218/H124* trans-heterozygous embryos. Primary branching was severely reduced, but not entirely abolished as in *btl* mutants, which lack the FGF receptor (Fig. 1C–E). *P218* and *H124* tracheal primordia remained as elongated sacs with dorsal extensions that frequently detached from the remaining primordia (Fig. 1B; Movie 2). Adjacent metameres often formed a partially interconnected dorsal trunk (DT; Fig. 1B) that appeared to become stretched during tube elongation, especially at sites where relatively few cells were present (Fig. 1B; Movie 3). Persisting DT connections revealed deposition of luminal material (Fig. 1F,G). Although tracheal development was severely affected, earlier processes, including gastrulation and germband retraction (Fig. 1A,B), appeared normal. However, the mutant embryos showed defects during later embryogenesis, including abnormal dorsal closure and head involution (not shown; Liu et al., 1999).

### *H124* and *P218* are allelic to the *fas* locus

We mapped the lethality of *H124* and *P218* to a small interval (50B4–B6) comprising six annotated genes (Fig. 2A;

<sup>1</sup>Institute of Neurobiology, University of Münster, Badestrasse 9, 48149 Münster, Germany. <sup>2</sup>Cluster of Excellence EXC 1003, Cells in Motion (CiM), 48149 Münster, Germany. <sup>3</sup>Institute of Molecular Life Sciences, University of Zürich, Winterthurerstrasse 190, 8057 Zürich, Switzerland. <sup>4</sup>SIB Swiss Institute of Bioinformatics, 8057 Zürich, Switzerland.

\*Author for correspondence (luschni@uni-muenster.de)

© M.D.R., 0000-0002-3048-5518; S.L., 0000-0002-0634-3368

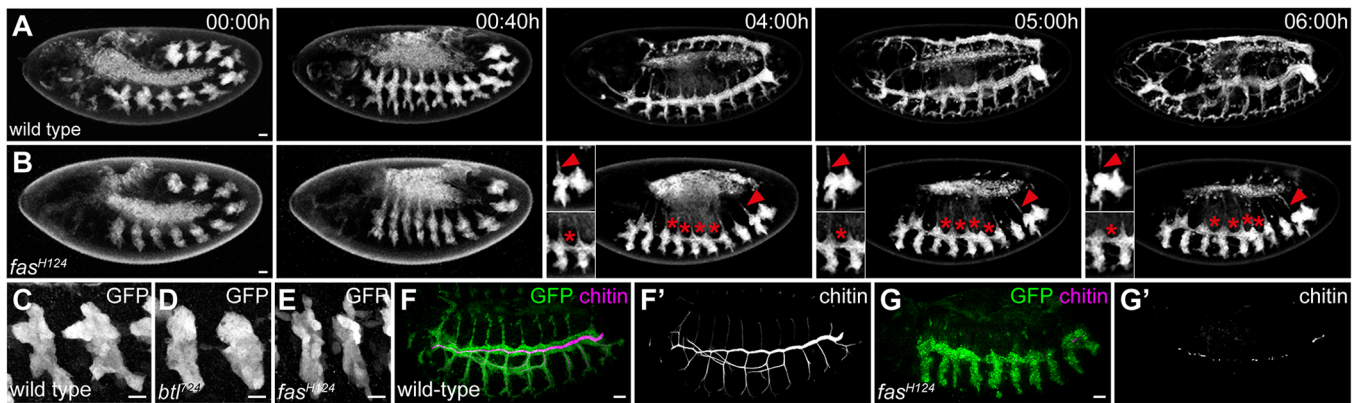

**Fig. 1. *H124* mutants show impaired primary tracheal branch outgrowth.** (A,B) Time-lapse imaging of wild-type (A) and *fas*<sup>H124</sup> (B) embryos ( $n=5$ ). Tracheal cells are labelled with palmitoylated mNeonGreen. Primary branch outgrowth is reduced in *fas* embryos, although most metameres extend dorsal branches, which occasionally break off (arrowheads). Partial dorsal trunk connections are indicated by asterisks. (C-E) Stage 12 wild-type (C), *btl* (D) and *fas*<sup>H124</sup> (E) embryos expressing cytosolic GFP in tracheal cells ( $n=5$ ). Unlike in *btl* embryos (D), branching in *fas* embryos (E) is not completely abolished. (F-G') Stage 14 wild-type (F,F') and *fas*<sup>H124</sup> (G,G') embryos expressing GFP in tracheal cells and stained for chitin ( $n=8$ ). Chitin is deposited in partial dorsal trunk connections in *fas* mutants. Scale bars: 20  $\mu\text{m}$  in A,B,F-G'; 10  $\mu\text{m}$  in C-E.

supplementary Materials and Methods). A lethal P-element insertion (*P{PZ}05488*) in this interval failed to complement *H124* and *P218* mutants. *P{PZ}05488* is an allele of the *fas* (Nüsslein-Volhard et al., 1984) locus, which was reported to encode a secreted immunoglobulin domain protein (CG17761) expressed in the central nervous system (CNS) and in clusters of epidermal cells (Lekven et al., 1998). Furthermore, the ethyl methanesulfonate (EMS)-induced *fas*<sup>1</sup> mutation (Nüsslein-Volhard et al., 1984) failed to complement *P218* and *H124*, indicating that the two mutations are allelic to *fas*. However, expression of a UAS-*CG17761* transgene corresponding to the reported *fas* locus (Lekven et al., 1998) in the ectoderm of *fas* embryos did not lead to noticeable rescue of the tracheal defects (data not shown).

#### ***fas* mutations affect CG6197, a subunit of the spliceosomal Prp19 complex, but not the immunoglobulin domain protein CG17716**

*P{PZ}05488* is inserted upstream of the *fandango* (*fand*, *CG6197*) gene, which encodes a subunit of the NineTeen Complex/Prp19 complex (NTC/Prp19C; Fig. 2A; Guilgur et al., 2014) that is essential for spliceosome activation (Chanarat and Sträßer, 2013). Surprisingly, two *fand* alleles, *fand*<sup>1</sup> and *fand*<sup>2</sup> (Guilgur et al., 2014), failed to complement *P218* and *H124* mutants. Consistent with these findings, sequence analysis revealed premature stop codons in the *CG6197/fand* gene in *H124* and *P218* mutants (Fig. 2A). Moreover, we found that the *fas*<sup>1</sup> allele (Nüsslein-Volhard et al., 1984) carries a premature stop codon in *CG6197* within the same codon as *P218* (Fig. 2A). Conversely, we did not find any missense or nonsense mutations in the *CG17716* coding sequence in *H124*, *P218* and *fas*<sup>1</sup> mutants. Finally, the tracheal and CNS defects of *fas*<sup>H124/fas</sup><sup>1</sup> embryos were completely rescued by a genomic construct containing a wild-type copy of *CG6197* (Fig. 2C-F; Guilgur et al., 2014). Together, these findings indicate that the *fas* phenotype is caused by mutations in the NTC/Prp19C subunit CG6197 also known as Fand (Guilgur et al., 2014), and not, as previously reported, in the immunoglobulin domain protein CG17716 (Lekven et al., 1998). We therefore refer to the *CG6197* gene as *fas* from here onwards.

#### **Fas is required outside tracheal cells for tracheal cell migration**

To investigate whether *fas* function is required in tracheal cells for their normal migration, we expressed a Myc-tagged Fas (Fas-Myc) construct in tracheal cells of *fas* mutants. However, tracheal-specific expression of Fas-Myc was not sufficient to rescue tracheal morphogenesis (Fig. 2G,G'). Conversely, tracheal development was rescued when Fas-Myc was expressed in all cells within an entire body segment (Fig. 2H,H'). Furthermore, expression of Fas-Myc throughout the embryo except for tracheal cells (using ubiquitous *da*-Gal combined with *btl*-Gal80 to inhibit Gal4 specifically in tracheal cells) led to nearly complete rescue of tracheal development in *fas* embryos (Fig. 2I-J'). Although we cannot exclude that *btl*-Gal80-mediated inhibition of *da*-Gal4-driven Fas-Myc expression was incomplete, these findings suggest that tracheal cell migration depends on *fas* function in surrounding tissues.

#### **Zygotic loss of *fas* causes widespread intron retention**

Maternally provided Fas protein is essential for efficient mRNA splicing in the early embryo (Guilgur et al., 2014; Martinho et al., 2015), but zygotic functions of *fas* have not been addressed thus far. We found that Fas protein levels were strongly reduced in *fas*<sup>H124</sup> and *fas*<sup>P218</sup> late-stage embryos (15–18 h AEL), although residual amounts of Fas protein, presumably representing maternal Fas protein, were still detectable by immunoblot (Fig. 2B).

To systematically identify changes in mRNAs, which may account for the tracheal defects in *fas* embryos, we performed high-throughput transcriptome sequencing (RNAseq). Total RNA was extracted from *fas*<sup>P218</sup> and control embryos at 12–13 h AEL, when tracheal development showed first signs of perturbation in *fas* mutants. Most strikingly, we observed an accumulation of transcripts with retained intronic sequences in *fas* mutants (Fig. 3A). Out of 47,590 introns present in 11,059 genes, the relative inclusion rate of 6453 introns (13.6%) was increased significantly (FDR<0.01) and at least 2.83-fold in *fas*<sup>P218</sup> embryos (Fig. 3B; log<sub>2</sub> FC $\geq$ 1.5; Table S1). These retained introns were present in 3629 genes, suggesting that lack of Fas does not uniformly affect splicing of all introns, but that a subset of transcripts or introns is more susceptible to escape

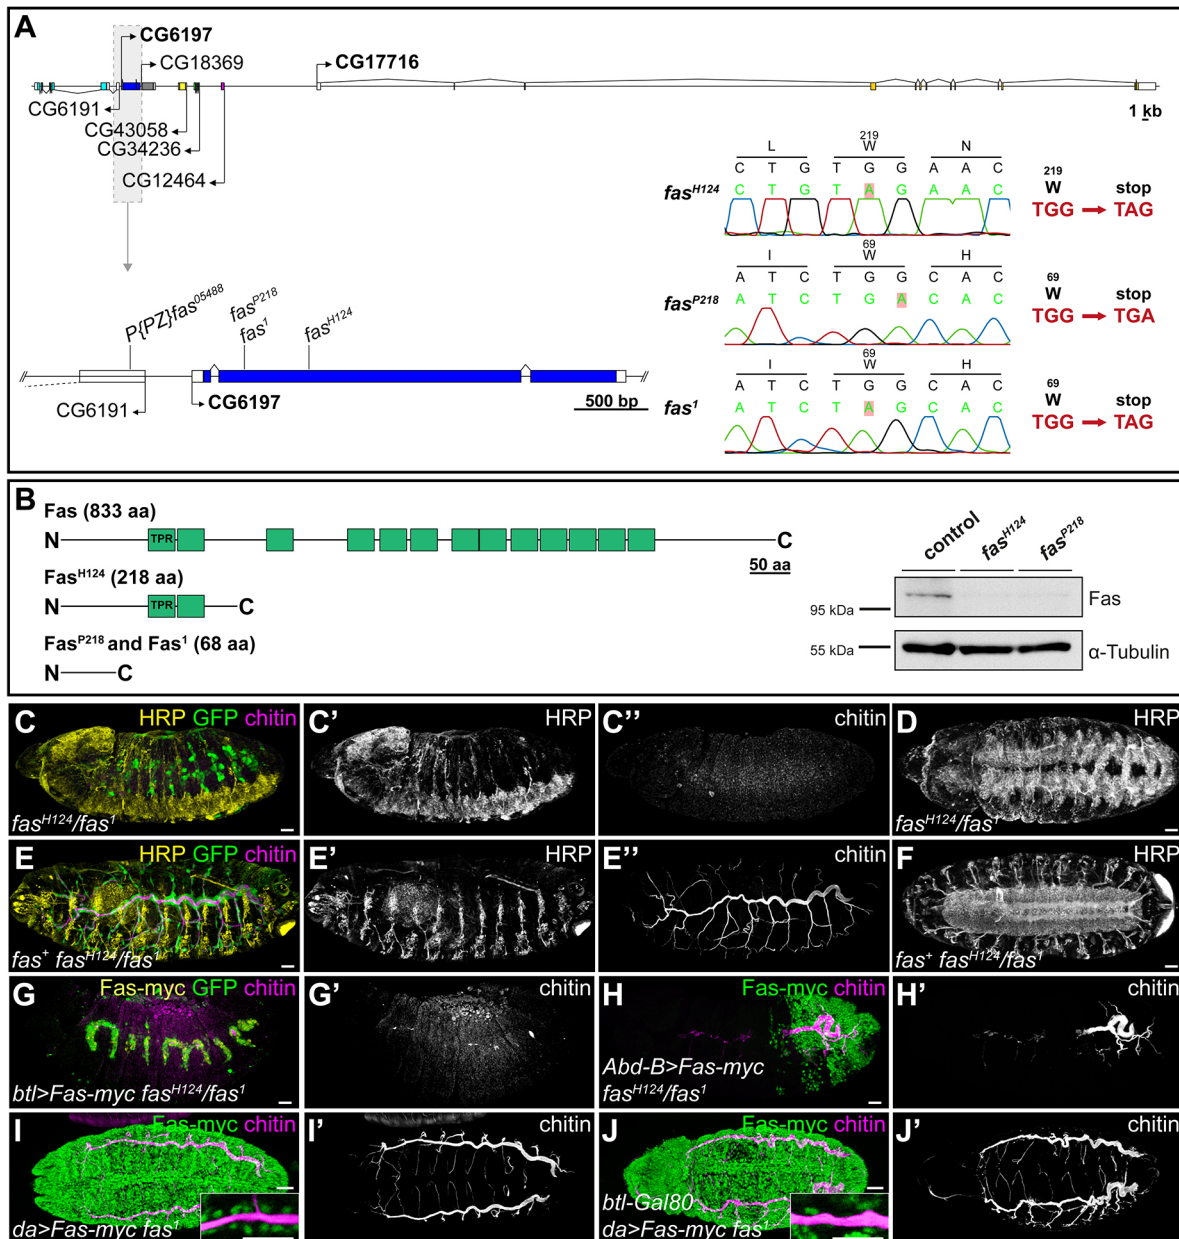

**Fig. 2. The NTC/Prp19C subunit *fas* is required for tracheal branching.** (A) Structure of the *CG6179* (*fas*) locus. *fas<sup>H124</sup>*, *fas<sup>P218</sup>* and *fas<sup>1</sup>* mutants carry premature stop-codons in *CG6179*. (B) Domain structure of Fas protein. *fas* mutants produce predicted truncated proteins lacking 11 (*fas<sup>H124</sup>*) or all (*fas<sup>P218</sup>* and *fas<sup>1</sup>*) of the 13 tetratricopeptide repeats (TPR; predicted by TPRpred; <https://toolkit.tuebingen.mpg.de/>). Immunoblot from *fas* mutant and wild-type control embryos (15–18 h AEL) shows severely reduced Fas protein levels in *fas* mutants. (C–F) A genomic *fas* (*CG6179*) transgene (*fas<sup>+</sup>*) rescues tracheal and CNS defects of *fas<sup>H124</sup>/fas<sup>1</sup>* embryos ( $n=6$ ). Lateral (C–C', E–E') and ventral (D, F) views of *fas* embryos (stage 15) lacking (C–C', D) or carrying (E–E', F) the *fas<sup>+</sup>* construct. Embryos are stained for chitin (magenta) and HRP (yellow). Tracheal and CNS development are completely restored by the *fas<sup>+</sup>* construct. (G–H') *fas<sup>H124</sup>/fas<sup>1</sup>* embryos (stage 15) expressing cytosolic GFP (green) in tracheal cells and stained for chitin (magenta). Fas-Myc (green) fails to rescue tracheal branching when expressed in tracheal cells using *btl-Gal4* ( $n=8$ ; G, G'), but rescues tracheal branching when expressed in the entire posterior body using *Abd-B-Gal4* ( $n=7$ ; H, H'). (I–J') Ubiquitous expression of Fas-Myc driven by *da-Gal4* (I, I') completely rescues tracheal development in *fas<sup>1</sup>* embryos (stage 15). Tracheal development is also largely rescued when Fas-Myc expression is blocked in tracheal cells by *btl-Gal80* ( $n=3$ ; J, J'). Insets show Fas-Myc in the nuclei of the tracheal DT (single plane). Scale bars: 20  $\mu$ m in C–H'; 30  $\mu$ m in I–J'; 20  $\mu$ m in insets.

splicing in the absence of Fas. Similarly, among the set of retained introns, some were more frequently retained than others. This was observed also for different introns within the same transcript (e.g. *CG17716*; Fig. 3B,C). For example, of the 6453 introns with at least 2.83-fold increased retention (FDR<0.01,  $\log_2$  FC $\geq$ 1.5), 2968 were increased fourfold or more ( $\log_2$  FC $\geq$ 2) and 896 were increased at least 16-fold ( $\log_2$  FC $\geq$ 4),

suggesting that specific introns may be especially prone to splicing defects when Prp19C function becomes limiting. Although introns with high retention rates show some association with intron length, GC content, number of introns per gene and transcript expression level, these weak associations could be partially explained by higher statistical power when counts are higher (Fig. S1).

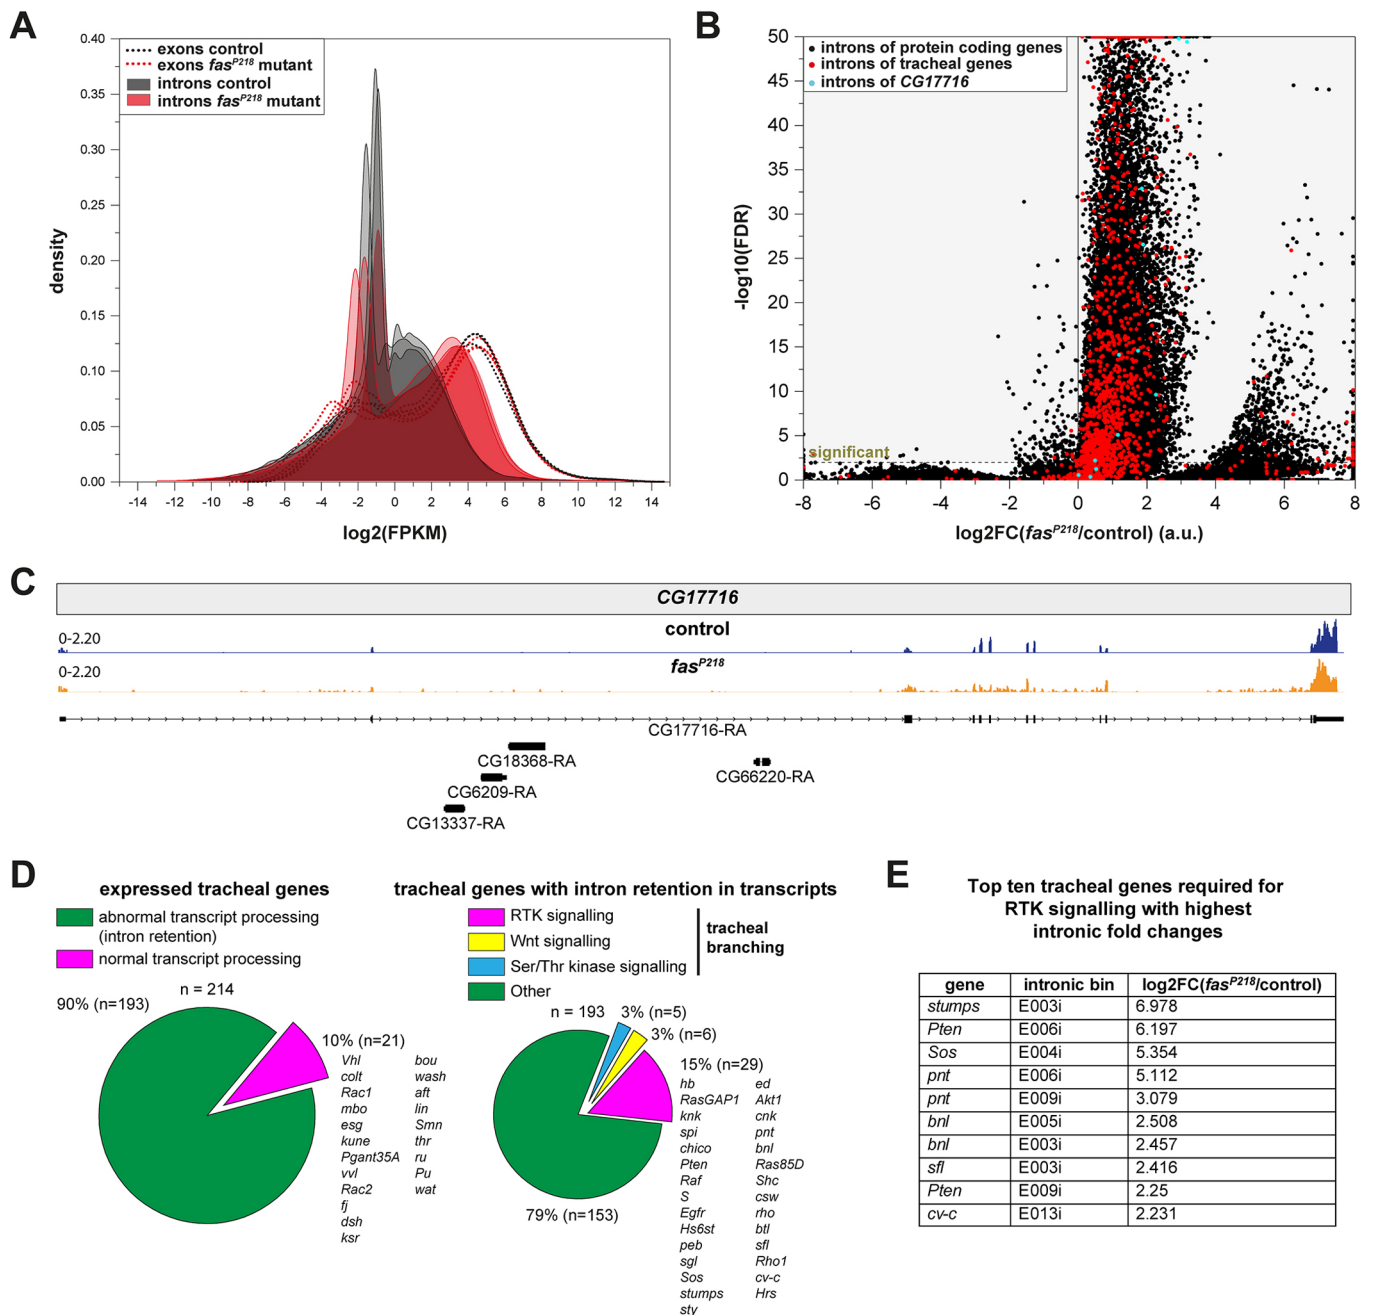

**Fig. 3. Zygotic *fas* function is required for efficient mRNA splicing.** (A) Density plots showing abundance of intronic and exonic sequences across all transcripts in *fas*<sup>P218</sup> and control embryos. Intronic sequences accumulate in *fas*<sup>P218</sup> mutants. FPKM, fragments per kilobase of transcript per million mapped fragments. (B) Intron retention. A large number of introns reveal significant (FDR < 0.01) retention in *fas*<sup>P218</sup> embryos. The separate (right-hand) cluster of data points with large positive fold-changes mainly corresponds to intron bins with low intron inclusion levels in at least one condition. (C) Coverage plots of *CG17716* transcript. There are intronic reads in *fas*<sup>P218</sup>, but not in the control. (D) Pie charts showing abnormal transcript processing for tracheal genes in *fas* mutants. Left: tracheal genes with abnormal transcript processing. Ninety percent of the expressed genes with functions in tracheal development reveal significant intron retention (FDR < 0.01). Right: functional classification of tracheal transcripts showing intron retention. Genes required for RTK signalling are listed. (E) Top ten tracheal genes involved in RTK signalling, ranked by intron retention fold changes (log<sub>2</sub>FC).

Out of 326 genes with annotated functions during tracheal development (GO:0007424; FlyBase), 214 genes were considered as expressed (see supplementary Materials and Methods). Ninety percent (193 genes) of these expressed tracheal genes revealed abnormal transcript processing (gene-level FDR < 0.01; Fig. 3D). Most of the remaining normally processed transcripts were derived either from intron-less genes or from genes with only a few short introns (Fig. 3D). The tracheal cell migration defects in *fas* embryos

could in principle be explained by abnormal splicing of transcripts encoding components of FGF and EGF signalling (Fig. 3D). However, transcripts with highest intronic fold-changes in *fas* mutants include several receptor tyrosine kinase (RTK) signalling components acting either upstream (Bnl, Sfl) or downstream (Stumps, Sos) of the RTKs (Fig. 3E), suggesting that the tracheal defects in *fas* embryos are unlikely to be attributable to changes in the expression of a specific gene.

In addition to the splicing defects, many genes showed dramatic changes in transcript levels (Table S2). Of 9606 expressed genes, 11.5% were downregulated at least 0.35-fold ( $\log_2 FC \leq -1.5$ ; FDR  $< 0.01$ ) and 6.7% were upregulated at least 2.83-fold ( $\log_2 FC \geq 1.5$ ; FDR  $< 0.01$ ). We conclude that lack of zygotic Fas protein severely affects the efficiency of RNA splicing in the developing embryo, resulting in qualitative (intron retention) as well as quantitative (transcript abundance) changes in gene expression.

#### EGF and FGF signalling are compromised in *fas* embryos

Analysis of all mis-spliced tracheal transcripts in *fas* mutants revealed abnormal transcript processing and changes in expression levels of several components of EGF and FGF signalling (Fig. S2A,B).

To validate the functional consequences of the splicing defects, we analysed EGF and FGF signalling activity during tracheal morphogenesis. The branch identity gene *spalt* (*sal*; Kuhnlein and Schuh, 1996) is expressed in tracheal placodes upon activation of Wnt and EGF signalling (Chihara and Hayashi, 2000). Sal signals in tracheal cells of *fas* embryos were strongly reduced (Fig. 4A,B). Similarly, FGF-dependent ERK activation (dpERK) at tracheal branch tips was severely diminished (Fig. 4C,D), and FGF-induced specification of DSRF-positive tracheal terminal cells was completely abolished (Fig. 4E,F). However, the residual tracheal branching in *fas* mutants (Fig. 1E) suggests that FGF and EGF signalling pathways are partially active, but that their output is quantitatively reduced. We therefore asked whether the output of

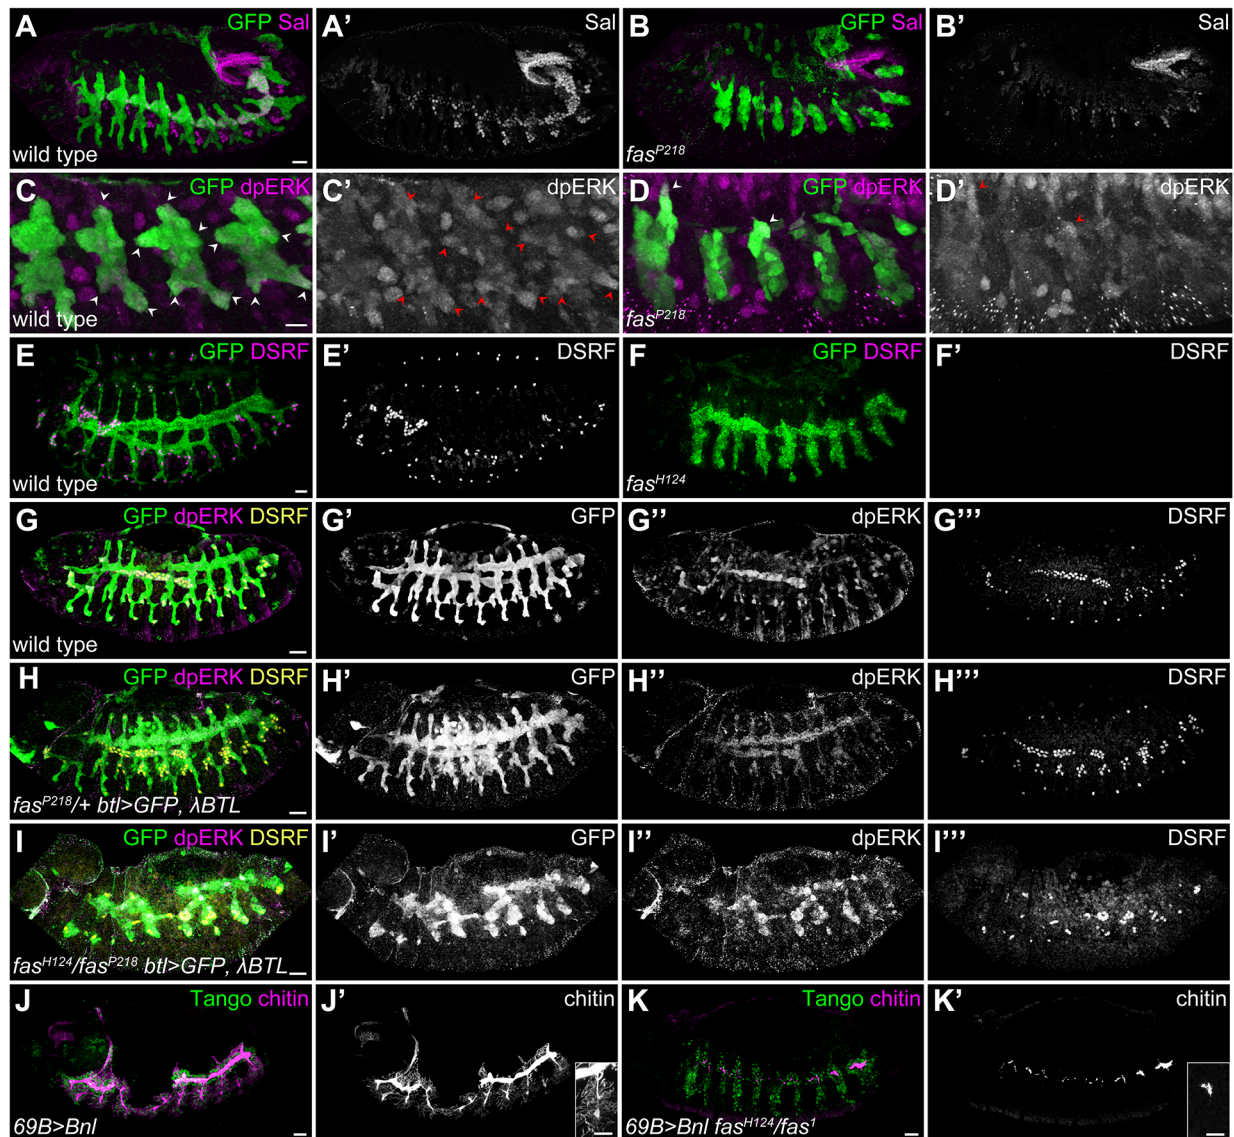

**Fig. 4. Fas is required for FGF and EGF signalling.** (A-B') Stage 12 wild-type (A,A') and *fas*<sup>P218</sup> (B,B') embryos expressing cytosolic GFP (green) in tracheal cells and stained for Sal (magenta). *fas* embryos show severely reduced Sal expression in tracheal cells. (C-D') Stage 12 wild-type (C,C') and *fas*<sup>P218</sup> (D,D') embryos stained for dpERK (magenta). dpERK accumulates at tracheal branch tips (arrowheads). *fas* embryos lack dpERK accumulation in tracheal cells. (E-F') Stage 14 wild-type (E,E') and *fas*<sup>H124</sup> (F,F') embryos stained for GFP (green) and DSRF (magenta). *fas* embryos lack DSRF-positive terminal cells. (G-I''') Stage 14 wild-type (G-G'''), *fas* heterozygous (H-H''') and *fas* homozygous (I-I''') embryos expressing GFP (G-I''') and constitutively active FGF ( $\lambda$ Btl; H-H''', I-I''') in tracheal cells, stained for GFP (green), dpERK (magenta) and DSRF (yellow). Tracheal dpERK accumulation (compare D' with I'') and DSRF expression (compare F' with I'') are partially restored upon  $\lambda$ Btl expression. (J-K') Stage 15 control (J,J') and *fas*<sup>H124</sup>/*fas*<sup>1</sup> (K,K') embryos misexpressing Bnl in the epidermis under the control of 69B-Gal4. Bnl misexpression causes excessive tracheal branching in control, but not in *fas* embryos (compare J' with K'). Scale bars: 20  $\mu$ m in A-B', E-K'; 10  $\mu$ m in C-D'; 15  $\mu$ m in J', K' (insets).

FGF signalling can be restored in *fas* mutants through expression of a constitutively active FGF receptor ( $\lambda$ Btl; Lee et al., 1996). Indeed, we observed high ERK activation and DSRF-positive terminal cells upon constitutive activation of Btl FGFR signalling in tracheal cells of *fas* embryos (Fig. 4G-I).

The requirement of *fas* outside tracheal cells suggested that events upstream of FGFR, possibly including the production of Bnl FGF, may be compromised in the absence of *fas* function. We therefore tested whether misexpression of Bnl FGF was able to restore tracheal branching in *fas* mutants. Misexpression of a *bnl* cDNA in the epidermis caused ectopic tracheal branching in wild-type controls, but not in *fas* embryos (Fig. 4J,K). Together, these findings suggest that while zygotic Fas function is not strictly required for signalling downstream of FGFR, it is essential for the activation of signalling by Bnl FGF, although the tracheal branching defects in *fas* mutants are not solely attributable to mis-splicing of *bnl* transcripts.

## DISCUSSION

We describe the requirement of the NTC/Prp19C subunit Fas for tracheal branching morphogenesis. Although mRNA splicing is generally required for transcript maturation, we found that embryos lacking zygotic *fas* function display surprisingly specific organogenesis defects. First, we show that the NTC/Prp19C subunit CG6197 is required for tracheal branching. We demonstrate that the *fas* locus (Nüsslein-Volhard et al., 1984), previously reported to encode the secreted immunoglobulin domain protein CG17716 (Lekven et al., 1998), in fact encodes the NTC/Prp19C subunit CG6197 also known as *fand* (Guilgur et al., 2014). Second, we show that loss of zygotic *fas* function results in widespread perturbation of splicing, consistent with previous work demonstrating an essential requirement of maternal *CG6197/fand* function for efficient splicing during early embryogenesis (Guilgur et al., 2014; Martinho et al., 2015). Abnormal transcript processing in *fas* mutants manifests predominantly in intron retention, accompanied by changes in transcript abundance. Third, we show that compromised FGF and EGF signalling may contribute to the tracheal branching defects in *fas* mutants. The requirement of Fas in non-tracheal cells (Fig. 2G-J) and the results of our epistatic analysis (Fig. 4G-K) suggest that *fas* function is essential for the activation of the Btl FGFR.

The late onset and the specific nature of tracheal and CNS (Lekven et al., 1998; Liu et al., 1999) defects in zygotic *fas* embryos was surprising, given that pre-mRNA processing is generally perturbed in the mutants. However, maternally provided gene products, including Fas protein itself, are likely to allow for largely normal development during early embryogenesis. As maternal Fas protein decays over time, Fas levels appear to become limiting at the onset of tracheal morphogenesis during mid-embryogenesis. Perturbed pre-mRNA processing in *fas* mutants is accompanied by substantial changes in the levels of many transcripts. Nonsense-mediated mRNA decay (Wilusz et al., 2001) is expected to degrade a large fraction of mis-spliced transcripts. In addition, indirect effects on transcriptional regulation are likely to influence gene expression in *fas* mutants. Of note, the abnormally processed transcripts in *fas* embryos include *CG17716* mRNA (Fig. 3C), consistent with the finding of Lekven et al. (1998) that *CG17716* protein was undetectable in *fas* embryos.

We report an example of strikingly specific developmental defects associated with a lack of efficient splicing. How can a general perturbation of splicing lead to specific phenotypes? First, tissue-specific expression of some splicing factors, including Prp19 (Urano et al., 2006), might account for tissue-dependent differences in splicing efficiency. Second, pre-mRNAs contain

diverse auxiliary *cis*-acting regulatory elements that are recognized by a multitude of splicing factors (Zhang et al., 2008). Consequently, different introns may show distinct sensitivities towards the lack of a given splicing factor. In addition, intron number, transcript abundance and transcript stability may render some RNAs more prone to accumulating splicing errors than others. Finally, dynamic cellular processes, such as cellularization (Guilgur et al., 2014) and tracheal branching, which involve rapid regulation of gene expression, may depend more acutely on efficient mRNA processing. Consistent with this idea, highly expressed and rapidly regulated genes tend to have only few and short introns (Castillo-Davis et al., 2002; Jeffares et al., 2008).

Our findings allow us to define the most sensitive gene expression events required for proper organogenesis. Characterizing NTC/Prp19C function and regulation in different organs could therefore contribute to a better understanding of how differential gene expression is regulated during organogenesis.

## MATERIALS AND METHODS

### *Drosophila* strains and genetics

Unless noted otherwise, *Drosophila* stocks are described in FlyBase and were obtained from the Bloomington Stock center: *btl*<sup>724</sup> (Ghabrial and Krasnow, 2006); *fas*<sup>1</sup> (Nüsslein-Volhard et al., 1984); *CG6197*<sup>+</sup> (*fas*<sup>+</sup>, genomic *fas* transgene); *UAS-CG6197-myc* (*UAS-Fas-myc*), *fand*<sup>1</sup>, *fand*<sup>2</sup> (Guilgur et al., 2014); *UAS-bnl* (Sutherland et al., 1996); *UAS- $\lambda$ Btl* (Lee et al., 1996); *UAS-palm-mNeonGreen* (this study); *UAS-CG17716* (this study); *btl-Gal4* (Shiga et al., 1996); *Abd-B-Gal4* (de Navas et al., 2006); *btl-Gal80* (Nikolova and Metzstein, 2015); *da-Gal4*; and *69B-Gal4*. *fas*<sup>H124</sup> and *fas*<sup>P218</sup> were isolated in an EMS mutagenesis screen (Förster et al., 2010; see supplementary Materials and Methods).

### Immunoblots

Protein extracts from embryos (15–18 h AEL) were analysed on immunoblots. Antibodies were rabbit anti-Fas (1:1000; Guilgur et al., 2014), mouse anti- $\alpha$ -tubulin Dm1A (1:10,000; Sigma), goat anti-rabbit Superclonal HRP conjugate (1:5000; Thermo Fischer) and goat anti-mouse Superclonal HRP conjugate (1:5000; Thermo Fischer). Three independent replicates (embryo collections) were analysed.

### Molecular biology

A DNA fragment corresponding to *CG17716-PA* cDNA (FlyBase) was synthesized (GenScript), cloned into pUAST-attB (*EcoRI/HindIII*) and integrated into the attP2 (68A4) landing site using PhiC31 integrase (Bischof et al., 2007). The coding sequence of monomeric yellow-green fluorescent protein (mNeonGreen; Shaner et al., 2013) fused to an N-terminal palmitoylation signal was synthesized (GenScript) using the *D. melanogaster* codon distribution, cloned into pUAST-attB (*EcoRI/XbaI*) and integrated into the attP2 landing site. See supplementary Materials and Methods and Table S3 for sequencing of *fas* alleles.

### Immunostaining

Embryos were fixed in 4% formaldehyde for 20 min and devitellinized in methanol/heptane. Primary antibodies were chicken anti-GFP (1:500; Abcam #13970), mouse anti-DSRF (1:300; Samakovlis et al., 1996), rabbit anti-Sal (1:40; Kuhnlein and Schuh, 1996), mouse anti-Tango (1:100; DSHB), mouse anti-myc (9E10; 1:300; DSHB) and rabbit anti-dpERK (1:100; Cell Signaling Technology #4370). Goat secondary antibodies were conjugated with DyLight 488 (1:500; Abcam), Alexa Fluor 568 (1:300; Molecular Probes) or Cy5 (1:500; Jackson ImmunoResearch). Chitin was detected as previously described (Caviglia and Luschnig, 2013). Neurons were labelled using anti-HRP (1:1000; Dianova) conjugated with Alexa Fluor 647.

### Imaging

Imaging was performed on an Olympus FV1000 confocal microscope with 20 $\times$ /0.75 NA, 40 $\times$ /1.3 NA and 60 $\times$ /1.35 NA objectives or on a Zeiss

LSM710 with a 20×/1.0 NA objective. For live imaging, staged embryos were dechorionated, glued on a coverslip and immersed in Voltaef 10S oil. Images were processed using ImageJ (v2.0.0), Imaris (v8.3.1; Bitplane) and Adobe Photoshop. At least three embryos per genotype were analysed. See supplementary Materials and Methods for statistics and reproducibility.

### RNA sequencing

Total RNA was isolated from 12–13 h AEL *fas<sup>P218</sup> btl-Gal4 UAS-GFP UAS-Verm-mRFP* embryos and from control embryos (carrying the parental chromosome) using TRIzol (Thermo Fischer). RNA was precipitated in isopropanol with 0.3 M sodium acetate and treated with DNase I (Ambion) for 25 min at 37°C. cDNA libraries were generated using the Illumina RNASeq protocol and were sequenced with an Illumina HiSeq instrument. RNASeq experiments in three biological replicates (independent embryo collections) of control and *fas<sup>P218</sup>* embryos yielded 27 to 69 million paired-end reads per sample. Details on RNA-seq data analyses are provided in the supplementary Materials and Methods.

### Acknowledgements

We thank Rui Gonçalo Martinho, the Developmental Studies Hybridoma Bank and the Bloomington *Drosophila* Stock Center for providing fly stocks and antibodies. The Functional Genomics Center Zurich (FGCZ) provided support with RNA sequencing experiments. We thank Dirk Beuchle for help with genetic mapping, Simone Mumbauer for generating *UAS-CG17716* flies, Wilko Backer for technical support and Michaela Clever for comments on the manuscript. We are indebted to Christian Lehner for continuous support and discussions. We are grateful to Sofia Araujo and Rui Gonçalo Martinho for communication of unpublished work.

### Competing interests

The authors declare no competing or financial interests.

### Author contributions

J.S. and S.L. conceived and designed the experiments. J.S. performed the experiments. J.S., C.S. and M.D.R. analysed RNA-seq data. J.S. and S.L. wrote the manuscript. All authors discussed the results and edited the manuscript.

### Funding

J.S. was supported by a Boehringer Ingelheim Fonds fellowship. Work in S.L.'s laboratory was supported by the Schweizerischer Nationalfonds zur Förderung der Wissenschaftlichen Forschung (SNF 31003A\_141093\_1), the Universität Zürich, the Kanton Zürich, the Cells-in-Motion (CiM) – Cluster of Excellence (EXC 1003-CiM) and the Westfälische Wilhelms-Universität Münster.

### Data availability

The RNA-seq data has been deposited in ArrayExpress under Accession Number E-MTAB-5069.

### Supplementary information

Supplementary information available online at <http://dev.biologists.org/lookup/doi/10.1242/dev.144535.supplemental>

### References

- Bischof, J., Maeda, R. K., Hediger, M., Karch, F. and Basler, K. (2007). An optimized transgenesis system for *Drosophila* using germ-line-specific phiC31 integrases. *Proc. Natl. Acad. Sci. USA* **104**, 3312–3317.
- Castillo-Davis, C. I., Mekhedov, S. L., Hartl, D. L., Koonin, E. V. and Kondrashov, F. A. (2002). Selection for short introns in highly expressed genes. *Nat. Genet.* **31**, 415–418.
- Caviglia, S. and Luschnig, S. (2013). The ETS domain transcriptional repressor Anterior open inhibits MAP kinase and Wingless signaling to couple tracheal cell fate with branch identity. *Development* **140**, 1240–1249.
- Chanarat, S. and Sträßer, K. (2013). Splicing and beyond: the many faces of the Prp19 complex. *Biochim. Biophys. Acta* **1833**, 2126–2134.
- Chen, E. J., Frand, A. R., Chitouras, E. and Kaiser, C. A. (1998). A link between secretion and pre-mRNA processing defects in *Saccharomyces cerevisiae* and the identification of a novel splicing gene, RSE1. *Mol. Cell. Biol.* **18**, 7139–7146.
- Chihara, T. and Hayashi, S. (2000). Control of tracheal tubulogenesis by Wingless signaling. *Development* **127**, 4433–4442.
- de Navas, L., Foronda, D., Suzanne, M. and Sánchez-Herrero, E. (2006). A simple and efficient method to identify replacements of P-lacZ by P-Gal4 lines allows obtaining Gal4 insertions in the bithorax complex of *Drosophila*. *Mech. Dev.* **123**, 860–867.
- Faustino, N. A. and Cooper, T. A. (2003). Pre-mRNA splicing and human disease. *Genes Dev.* **17**, 419–437.
- Förster, D., Armbruster, K. and Luschnig, S. (2010). Sec24-dependent secretion drives cell-autonomous expansion of tracheal tubes in *Drosophila*. *Curr. Biol.* **20**, 62–68.
- Ghabrial, A. S. and Krasnow, M. A. (2006). Social interactions among epithelial cells during tracheal branching morphogenesis. *Nature* **441**, 746–749.
- Golling, G., Amsterdam, A., Sun, Z., Antonelli, M., Maldonado, E., Chen, W., Burgess, S., Haldi, M., Artzt, K., Farrington, S. et al. (2002). Insertional mutagenesis in zebrafish rapidly identifies genes essential for early vertebrate development. *Nat. Genet.* **31**, 135–140.
- Guilgur, L. G., Prudêncio, P., Sobral, D., Liszekova, D., Rosa, A. and Martinho, R. G. (2014). Requirement for highly efficient pre-mRNA splicing during *Drosophila* early embryonic development. *Elife* **3**, e02181.
- Hoyle, N. P. and Ish-Horowicz, D. (2013). Transcript processing and export kinetics are rate-limiting steps in expressing vertebrate segmentation clock genes. *Proc. Natl. Acad. Sci. USA* **110**, E4316–E4324.
- Jeffares, D. C., Penkett, C. J. and Bähler, J. (2008). Rapidly regulated genes are intron poor. *Trends Genet.* **24**, 375–378.
- Kuhnlein, R. P. and Schuh, R. (1996). Dual function of the region-specific homeotic gene spalt during *Drosophila* tracheal system development. *Development* **122**, 2215–2223.
- Lee, T., Hacohen, N., Krasnow, M. and Montell, D. J. (1996). Regulated Breathless receptor tyrosine kinase activity required to pattern cell migration and branching in the *Drosophila* tracheal system. *Genes Dev.* **10**, 2912–2921.
- Lekven, A. C., Tepass, U., Keshmeshian, M. and Hartenstein, V. (1998). faint sausage encodes a novel extracellular protein of the immunoglobulin superfamily required for cell migration and the establishment of normal axonal pathways in the *Drosophila* nervous system. *Development* **125**, 2747–2758.
- Liu, X., Kiss, I. and Lengyel, J. A. (1999). Identification of genes controlling malpighian tubule and other epithelial morphogenesis in *Drosophila melanogaster*. *Genetics* **151**, 685–695.
- Martinho, R. G., Guilgur, L. G. and Prudêncio, P. (2015). How gene expression in fast-proliferating cells keeps pace. *BioEssays* **37**, 514–524.
- Nikolova, L. S. and Metzstein, M. M. (2015). Intracellular lumen formation in *Drosophila* proceeds via a novel subcellular compartment. *Development* **142**, 3964–3973.
- Nüsslein-Volhard, C., Wieschaus, E. and Kluding, H. (1984). Mutations affecting the pattern of the larval cuticle in *Drosophila melanogaster*. I. Zygotic loci on the second chromosome. *Roux's Arch. Dev. Biol.* **193**, 267–282.
- Quesada, V., Conde, L., Villamor, N., Ordóñez, G. R., Jares, P., Bassaganyas, L., Ramsay, A. J., Beà, S., Pinyol, M., Martínez-Trillos, A. et al. (2011). Exome sequencing identifies recurrent mutations of the splicing factor SF3B1 gene in chronic lymphocytic leukemia. *Nat. Genet.* **44**, 47–52.
- Samakovlis, C., Hacohen, N., Manning, G., Sutherland, D. C., Guillemin, K. and Krasnow, M. A. (1996). Development of the *Drosophila* tracheal system occurs by a series of morphologically distinct but genetically coupled branching events. *Development* **122**, 1395–1407.
- Shaner, N. C., Lambert, G. G., Chammas, A., Ni, Y., Cranfill, P. J., Baird, M. A., Sell, B. R., Allen, J. R., Day, R. N., Israelsson, M. et al. (2013). A bright monomeric green fluorescent protein derived from *Branchiostoma lanceolatum*. *Nat. Methods* **10**, 407–409.
- Shiga, Y., Tanaka-Matakatsumi, M. and Hayashi, S. (1996). A nuclear GFP/beta-galactosidase fusion protein as a marker for morphogenesis in living *Drosophila*. *Dev. Growth Differ.* **38**, 99–106.
- Sutherland, D., Samakovlis, C. and Krasnow, M. A. (1996). branchless encodes a *Drosophila* FGF homolog that controls tracheal cell migration and the pattern of branching. *Cell* **87**, 1091–1101.
- Urano, Y., Iiduka, M., Sugiyama, A., Akiyama, H., Uzawa, K., Matsumoto, G., Kawasaki, Y. and Tashiro, F. (2006). Involvement of the mouse Prp19 gene in neuronal/astroglial cell fate decisions. *J. Biol. Chem.* **281**, 7498–7514.
- van der Lelij, P., Stocsits, R. R., Ladurner, R., Petzold, G., Kreidl, E., Koch, B., Schmitz, J., Neumann, B., Ellenberg, J. and Peters, J.-M. (2014). SNW1 enables sister chromatid cohesion by mediating the splicing of sororin and APC2 pre-mRNAs. *EMBO J.* **33**, 2643–2658.
- Wilusz, C. J., Wang, W. and Peltz, S. W. (2001). Curbing the nonsense: the activation and regulation of mRNA surveillance. *Genes Dev.* **15**, 2781–2785.
- Zhang, C., Li, W.-H., Krainer, A. R. and Zhang, M. Q. (2008). RNA landscape of evolution for optimal exon and intron discrimination. *Proc. Natl. Acad. Sci. USA* **105**, 5797–5802.
